# Supplementary material for: Porphyrin dimers bridged by a platinum–diacetylide unit
Source: Royal Society of Chemistry journal article supplement (doi:10.1039/b513921j), 2006-01-01
Supplement: b513921j.pdf [file b513921j.pdf]

# Electronic Supplementary Information for “Porphyrin Dimers Bridged by a Platinum-diacetylide Unit”

Yi-Jen Chen,<sup>a</sup> Szu-Shuo Chen,<sup>a</sup> Shang-Shih Lo,<sup>a</sup> Teng-Hui Huang,<sup>a</sup> Chen-Chang Wu,<sup>a</sup>  
Gene-Hsiang Lee,<sup>b</sup> Shie-Ming Peng<sup>b</sup> and Chen-Yu Yeh\*<sup>a</sup>

<sup>a</sup>Department of Chemistry, National Chung Hsing University, 250 Kuo Kuang Road,  
Taichung 402, Taiwan

<sup>b</sup>Department of Chemistry, National Taiwan University, Taipei 106, Taiwan

[cyyeh@dragon.nchu.edu.tw](mailto:cyyeh@dragon.nchu.edu.tw)

## Synthesis

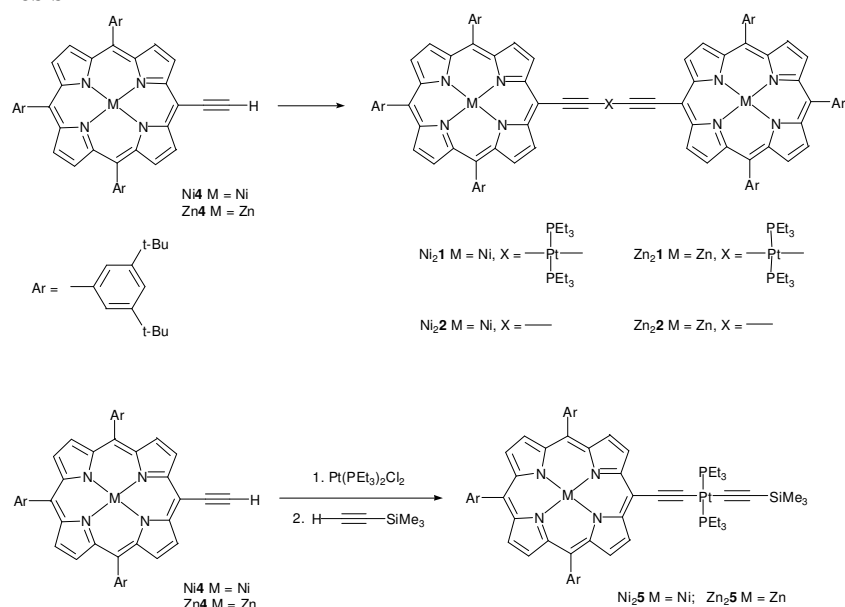

**Ni<sub>2</sub>1:** To a solution of compound **Ni4** (28 mg, 0.03 mmol) in Et<sub>2</sub>NH (5 mL) under N<sub>2</sub> was added *trans*-Pt(PEt<sub>3</sub>)<sub>2</sub>Cl<sub>2</sub> (7.5 mg, 0.015 mmol). The mixture was heated at 60 °C for 6 hr. After evaporation of the solvent under reduced pressure, the residue was purified by column chromatography on silica gel using CH<sub>2</sub>Cl<sub>2</sub>:Hexanes = 1:7 as the eluent. The solvent was removed under reduced pressure to give a purple solid (23 mg, 68%). <sup>1</sup>H NMR (400 MHz, CDCl<sub>3</sub>) δ<sub>H</sub> 9.64 (d, *J* = 4.4 Hz, 4H), 8.76 (d, *J* = 4.4 Hz, 4H), 8.68 (s, 8H), 7.86 (d, *J* = 1.6 Hz, 8H), 7.83 (d, *J* = 1.6 Hz, 4H), 7.70 (t, *J* = 1.6 Hz, 4H), 7.67 (t, *J* = 1.6 Hz, 2H), 2.41-2.38 (m, 12H), 1.48 (s, 72H), 1.45 (s, 36H), 1.46-1.38 (m, 18H); UV/Vis (CH<sub>2</sub>Cl<sub>2</sub>) λ<sub>max</sub>/nm (log ε): 449 (5.54), 552 (4.44), 595 (4.68); MS(ESI) *m/z* 2338, calculated for C<sub>140</sub>H<sub>172</sub>N<sub>8</sub>P<sub>2</sub>PtNi<sub>2</sub> 2338.

**Zn<sub>2</sub>1:** Employing a procedure similar to that for Ni<sub>2</sub>1 to yield 64% of the product. <sup>1</sup>H NMR (400 MHz, CDCl<sub>3</sub>) δ<sub>H</sub> 9.77 (d, *J* = 4.4 Hz, 4H), 8.95 (d, *J* = 4.4 Hz, 4H), 8.87 (s, 8H), 8.06 (d, *J* = 1.6 Hz, 8H), 8.03 (d, *J* = 1.6 Hz, 4H), 7.78 (t, *J* = 1.6 Hz, 4H), 7.75 (t, *J* = 1.6 Hz, 2H), 2.41-2.36 (m, 12H), 1.53 (s, 72H), 1.50 (s, 36H), 1.36-1.28 (m, 18H); UV/Vis (CH<sub>2</sub>Cl<sub>2</sub>) λ<sub>max</sub>/nm (log ε): 444 (5.76), 574 (4.27), 616 (4.62); MS(FAB) *m/z* 2351 (M+H<sup>+</sup>) calculated for C<sub>140</sub>H<sub>170</sub>N<sub>8</sub>P<sub>2</sub>PtZn<sub>2</sub> 2350.

**Zn<sub>2</sub>2:** To a solution of compound Zn4 (31 mg, 0.032 mmol) in a mixture of THF (4 mL) and NEt<sub>3</sub> (0.4 mL) under air was added CuI (0.6 mg, 0.003 mmol). The mixture was stirred at room temperature for 1 hr. After evaporation of the solvent under reduced pressure, the residue was purified by column chromatography on silica gel using CH<sub>2</sub>Cl<sub>2</sub>:Hexanes = 1:5 as the eluent. The solvent was removed under reduced pressure to give the product (20 mg, 66%). <sup>1</sup>H NMR (400 MHz, CDCl<sub>3</sub>) δ<sub>H</sub> 10.04 (d, *J* = 4.4 Hz, 4H), 9.13 (d, *J* = 4.4 Hz, 4H), 8.93 (s, 8H), 8.12 (s, 8H), 8.05 (s, 4H), 7.82 (t, *J* = 0.8 Hz, 4H), 7.78 (t, *J* = 0.8 Hz, 2H), 1.54 (s, 72H), 1.52 (s, 36H); UV/Vis (CH<sub>2</sub>Cl<sub>2</sub>) λ<sub>max</sub>/nm (log ε): 450 (5.54), 481 (5.47), 565 (4.49), 678 (4.98); MS(ESI) *m/z* 1922 calculated for C<sub>128</sub>H<sub>142</sub>N<sub>8</sub>Zn<sub>2</sub> 1922.

**Ni<sub>2</sub>2:** A solution of Zn<sub>2</sub>2 (50 mg, 0.025 mmol) in CH<sub>2</sub>Cl<sub>2</sub> (100 mL) was washed with aqueous HCl (10%, 100 mL) solution and then with aqueous NaHCO<sub>3</sub> solution. The organic layer was dried with Na<sub>2</sub>SO<sub>4</sub> and the solvent was evaporated under reduced pressure. The solid was dissolved in DMF (20 mL). After addition of Ni(OAc)<sub>2</sub> · 4H<sub>2</sub>O (125 mg, 0.50 mmol), the mixture was refluxed for 2 hr. The solution was concentrated, and the crude product was precipitated by addition of water and was then filtered. Chromatography on silica gel eluting with CH<sub>2</sub>Cl<sub>2</sub>:Hexanes = 1:5 afforded the product (43 mg, 90%). <sup>1</sup>H NMR (400 MHz, CDCl<sub>3</sub>) δ<sub>H</sub> 9.71 (d, *J* = 4.8 Hz, 4H), 8.91 (d, *J* = 4.8 Hz, 4H), 8.72 (s, 8H), 7.87 (d, *J* = 1.6 Hz, 8H), 7.83 (d, *J* = 1.6 Hz, 4H), 7.73 (t, *J* = 1.6 Hz, 4H), 7.69 (t, *J* = 1.6 Hz, 2H), 1.48 (s, 72H), 1.45 (s, 36H); UV/Vis (CH<sub>2</sub>Cl<sub>2</sub>) λ<sub>max</sub>/nm (log ε): 448 (5.22), 472 (5.22), 549 (4.38), 634 (4.67); MS(ESI) *m/z* 1908 calculated for C<sub>128</sub>H<sub>142</sub>N<sub>8</sub>Ni<sub>2</sub> 1908.

**Ni<sub>2</sub>5:** To a solution of compound Zn4 (20 mg, 0.02 mmol) in Et<sub>2</sub>NH (5 mL) under N<sub>2</sub> was added *trans*-Pt(PEt<sub>3</sub>)<sub>2</sub>Cl<sub>2</sub> (20 mg, 0.039 mmol). The mixture was heated at 60 °C for 30 min, after which trimethylsilylacetylene (50 μL, 0.35 mmol) was added. The mixture was heated at 60 °C for further 30 min. After evaporation of the solvent under reduced pressure, the residue was purified by column chromatography on silica gel using CH<sub>2</sub>Cl<sub>2</sub>:Hexanes = 1:6 as the eluent. The solvent was removed under reduced pressure to give the product in 65% yield. <sup>1</sup>H NMR (CDCl<sub>3</sub>, 400 MHz) : δ<sub>H</sub> 9.50 (d, *J*

= 4.8 Hz, 2H), 8.70 (d,  $J = 4.8$  Hz, 2H), 8.65 (s, 4H), 7.82 (d,  $J = 1.6$  Hz, 4H), 7.81 (d,  $J = 1.6$  Hz, 2H), 7.69 (d,  $J = 1.6$  Hz, 2H), 7.66 (d,  $J = 1.6$  Hz, 1H), 2.26 – 2.18 (m, 12H), 1.46 (s, 36H), 1.44 (s, 18H), 1.31–1.24 (m, 18H), 0.13 (s, 9H); UV-vis ( $\text{CH}_2\text{Cl}_2$ ):  $\lambda_{\text{max}}/\text{nm}$  ( $\log \epsilon$ ): 442 (5.52), 552 (4.28), 588 (4.39); MS (FAB) :  $m/z$  1483 ( $\text{M}+\text{H}^+$ ), calcd for  $\text{C}_{81}\text{H}_{110}\text{N}_4\text{NiP}_2\text{PtSi}$  1482.

**Zn5:** Employing a procedure similar to that for Ni5 to yield 60% of the product.  $^1\text{H}$  NMR ( $\text{CDCl}_3$ , 400 MHz) :  $\delta_{\text{H}}$  9.80 (d,  $J = 4.4$  Hz, 2H), 8.93 (d,  $J = 4.4$  Hz, 2H), 8.86 (s, 4H), 8.28 (d,  $J = 1.6$  Hz, 4H), 8.04 (d,  $J = 1.6$  Hz, 2H), 7.78 (d,  $J = 1.6$  Hz, 2H), 7.75 (d,  $J = 1.6$  Hz, 1H), 2.42 – 2.22 (m, 12H), 1.54 (s, 36H), 1.50 (s, 18H), 1.42–1.28 (m, 18H), 0.17 (s, 9H); UV-vis ( $\text{CH}_2\text{Cl}_2$ ):  $\lambda_{\text{max}}/\text{nm}$  ( $\log \epsilon$ ): 446 (5.60), 576 (4.10), 618 (4.52) ; MS (FAB) :  $m/z$  1489 ( $\text{M}+\text{H}^+$ ), calcd for  $\text{C}_{81}\text{H}_{110}\text{N}_4\text{P}_2\text{PtSiZn}$  1488.

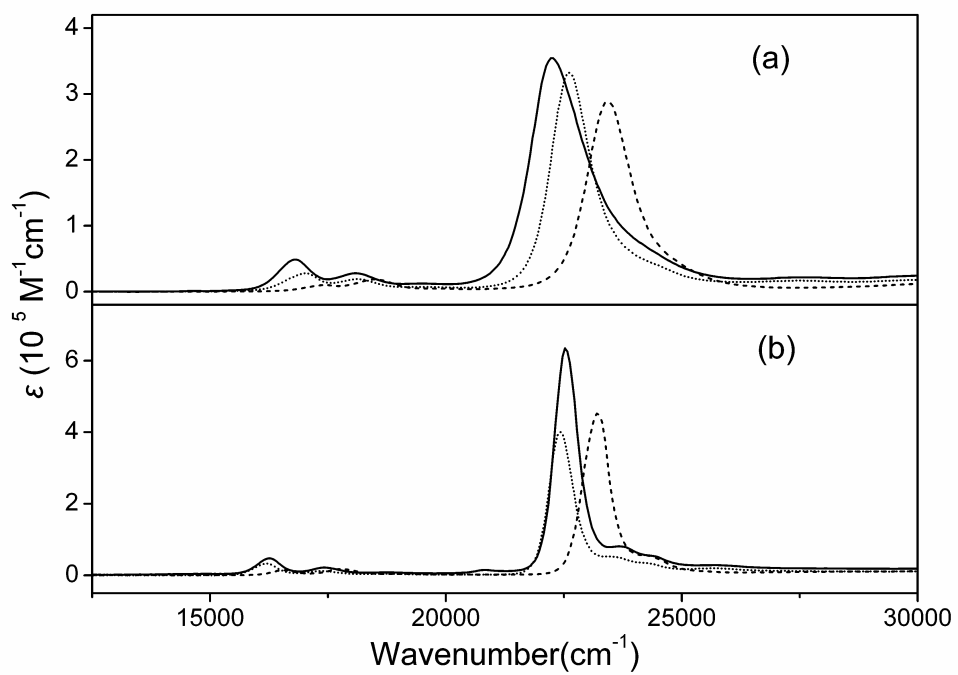

Figure S1. Absorption spectra of (a) Ni<sub>2</sub>1 (solid), Ni3 (dash), and Ni5 (dot), and (b) Zn<sub>2</sub>1 (solid), Zn3 (dash), Zn5 (dot) in CH<sub>2</sub>Cl<sub>2</sub>.

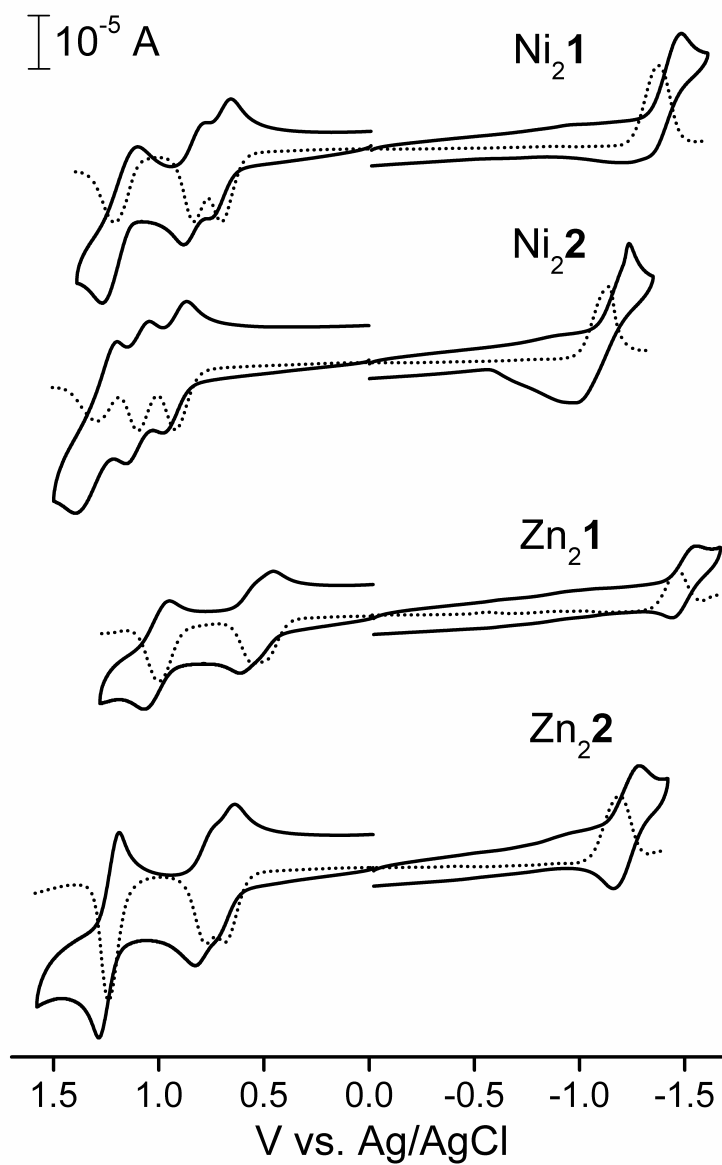

**Fig. S2** The cyclic voltammograms (solid) and differential pulse voltammograms (dot) of Ni<sub>2</sub>1, Ni<sub>2</sub>2, Zn<sub>2</sub>1, and Zn<sub>2</sub>2 in CH<sub>2</sub>Cl<sub>2</sub> containing 0.1 M TBAPF<sub>6</sub>.

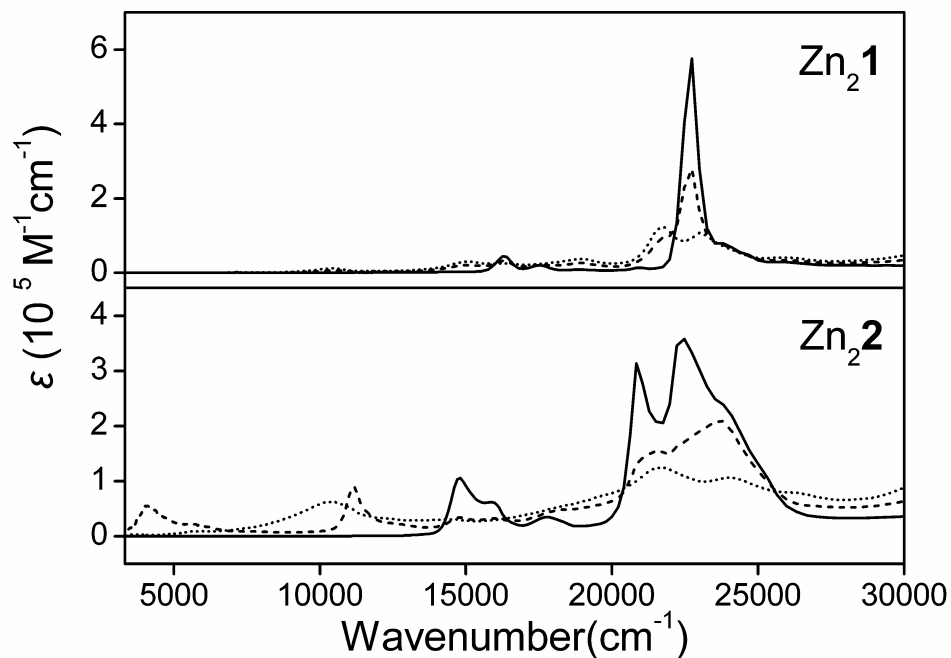

**Fig. S3** The absorption spectra of (a)  $\text{Zn}_2\mathbf{1}$  (solid),  $\text{Zn}_2\mathbf{1}^+$  (dash), and  $\text{Zn}_2\mathbf{1}^{2+}$  (dot), and (b)  $\text{Zn}_2\mathbf{2}$  (solid),  $\text{Zn}_2\mathbf{2}^+$  (dash), and  $\text{Zn}_2\mathbf{2}^{2+}$  (dot) in  $\text{CH}_2\text{Cl}_2$ . The mono- and dications were generated *in situ* by reacting the neutral molecules with 1 and 2 eq  $[(p\text{-BrC}_6\text{H}_4)_3\text{N}][\text{SbCl}_6]$ , respectively. In the case of  $\text{Zn}_2\mathbf{1}$ , the solution could contain three species  $\text{Zn}_2\mathbf{1}$ ,  $\text{Zn}_2\mathbf{1}^+$ , and  $\text{Zn}_2\mathbf{1}^{2+}$  in the presence of 1 eq  $[(p\text{-BrC}_6\text{H}_4)_3\text{N}][\text{SbCl}_6]$  since the potential separation for the first and second oxidations is small ( $\Delta E = 60$  mV).
